# Supplementary material for: Mechanism and toxicity assessment of carbofuran degradation by persulfate-based advanced oxidation process
Source: Royal Society of Chemistry journal article supplement (doi:10.1039/d4ra05365f), 2024-01-01
Supplement: d4ra05365f1.pdf [file d4ra05365f1.pdf]

## Supplementary information for

Mechanism and toxicity assessment of carbofuran degradation by  
persulfate-based advanced oxidation process

Chenxi Zhang<sup>a,b</sup>, Youxin Xu<sup>a,b</sup>, Bingbing Chu<sup>a</sup>, and Xiaomin Sun<sup>b,\*</sup>

a.Shandong Provincial University Laboratory for Protected Horticulture, Weifang  
University of Science and Technology, Weifang 262700, China

b.Environment Research Institute, Shandong University, Qingdao 266200, P.R.China

Table S1 The toxicity value of the transformation products in the degradation of CBF. The unit is  $\text{mg}\cdot\text{L}^{-1}$ .

| Name | Compound<br>molecular<br>weight | Configuration                                                                       | LC <sub>50</sub> |                |                | ChV   |                |                |
|------|---------------------------------|-------------------------------------------------------------------------------------|------------------|----------------|----------------|-------|----------------|----------------|
|      |                                 |                                                                                     | Fish             | Water<br>fleas | Green<br>algae | Fish  | Water<br>fleas | Green<br>algae |
| CBF  | 221                             | 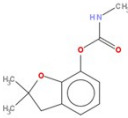   | 4.27             | 0.0093         | 2.59           | 0.408 | 0.016          | 0.479          |
| P1   | 237                             |    | 6.72             | 0.026          | 4.88           | 0.820 | 0.039          | 0.760          |
| P2   | 317                             |    | 65.8             | 4.71           | 121            | 28.4  | 3.76           | 7.70           |
| P3   | 239                             |  | 14.4             | 0.168          | 14.9           | 2.84  | 0.199          | 1.65           |
| P4   | 319                             |  | 141              | 30.6           | 370            | 98.1  | 19.1           | 16.7           |
| P5   | 244                             |  | 5340             | 2620           | 1060           | 439   | 170            | 201            |
| P6   | 75                              |  | 71100            | 2950           | 5980           | 4800  | 1200           | 776            |
| P7   | 237                             |  | 15.7             | 0.209          | 16.9           | 3.28  | 0.241          | 1.80           |
| P8   | 180                             |  | 554              | 297            | 173            | 50.6  | 24.6           | 39.8           |

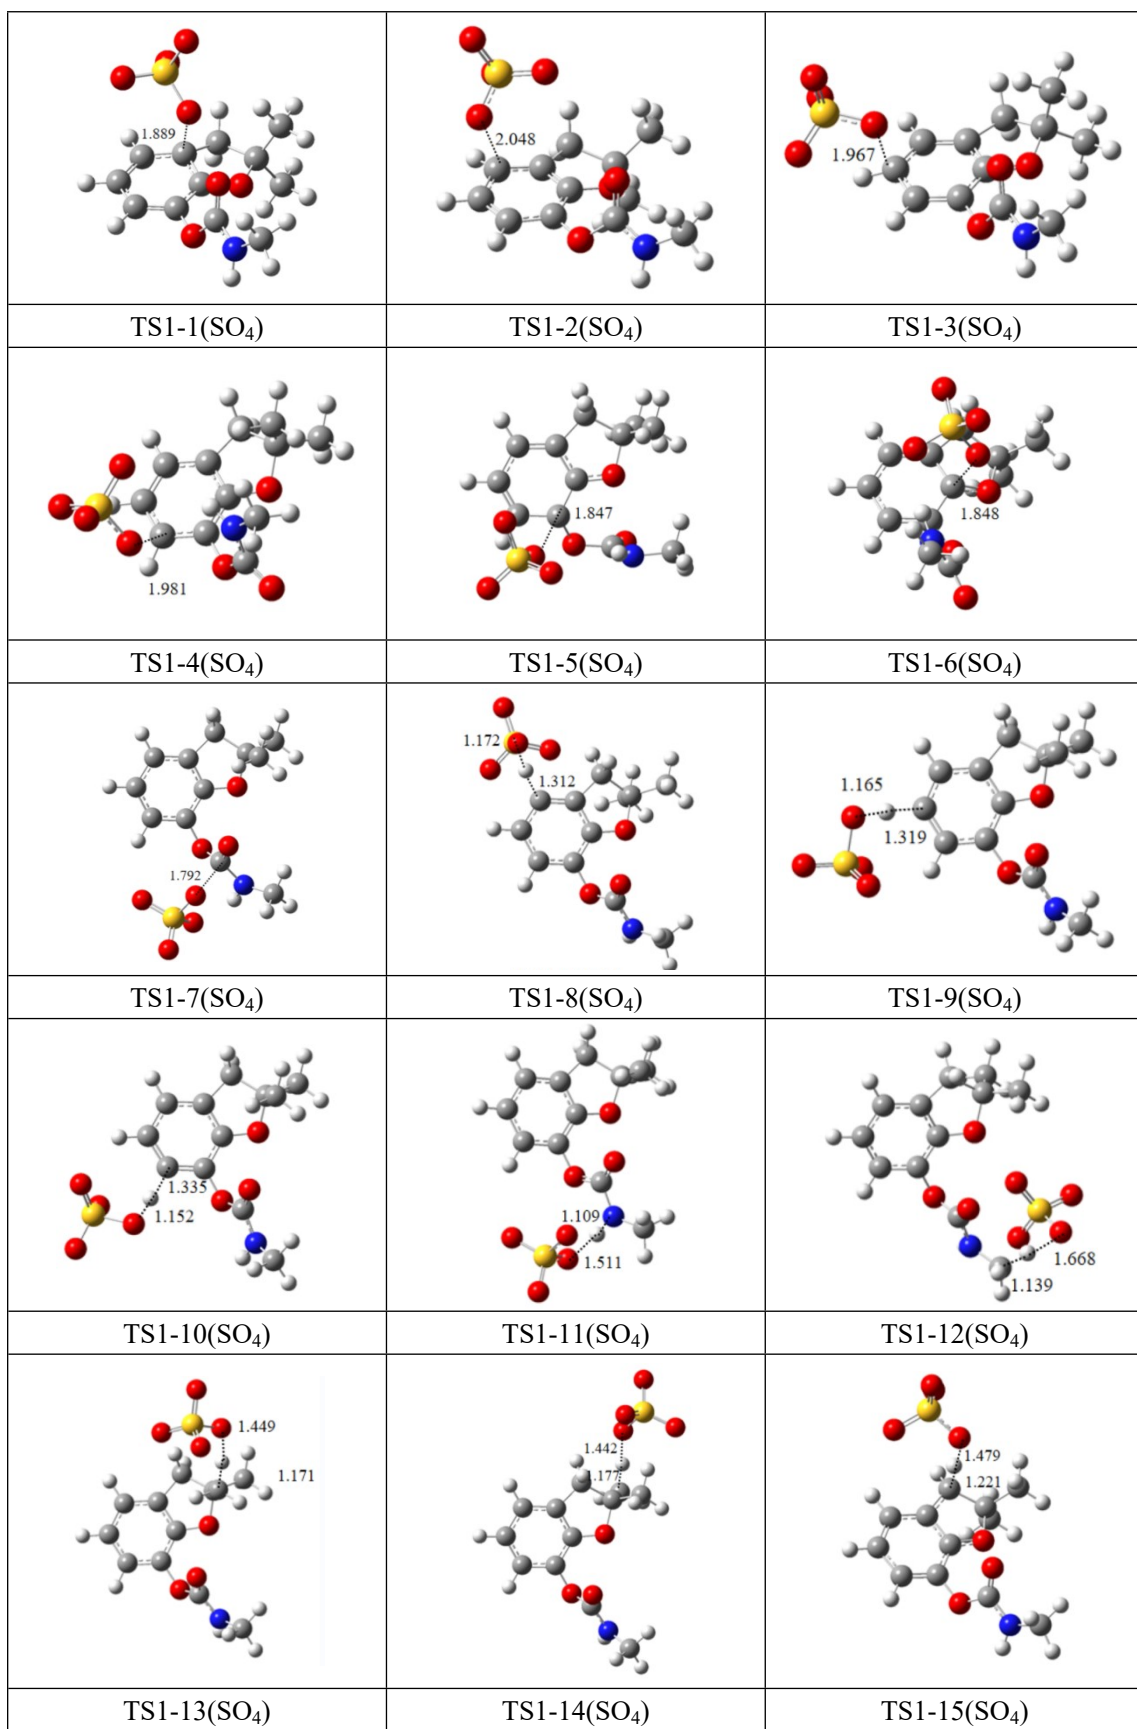

Fig. S1 Transition state configuration diagram of CBF with SO<sub>4</sub><sup>•-</sup>

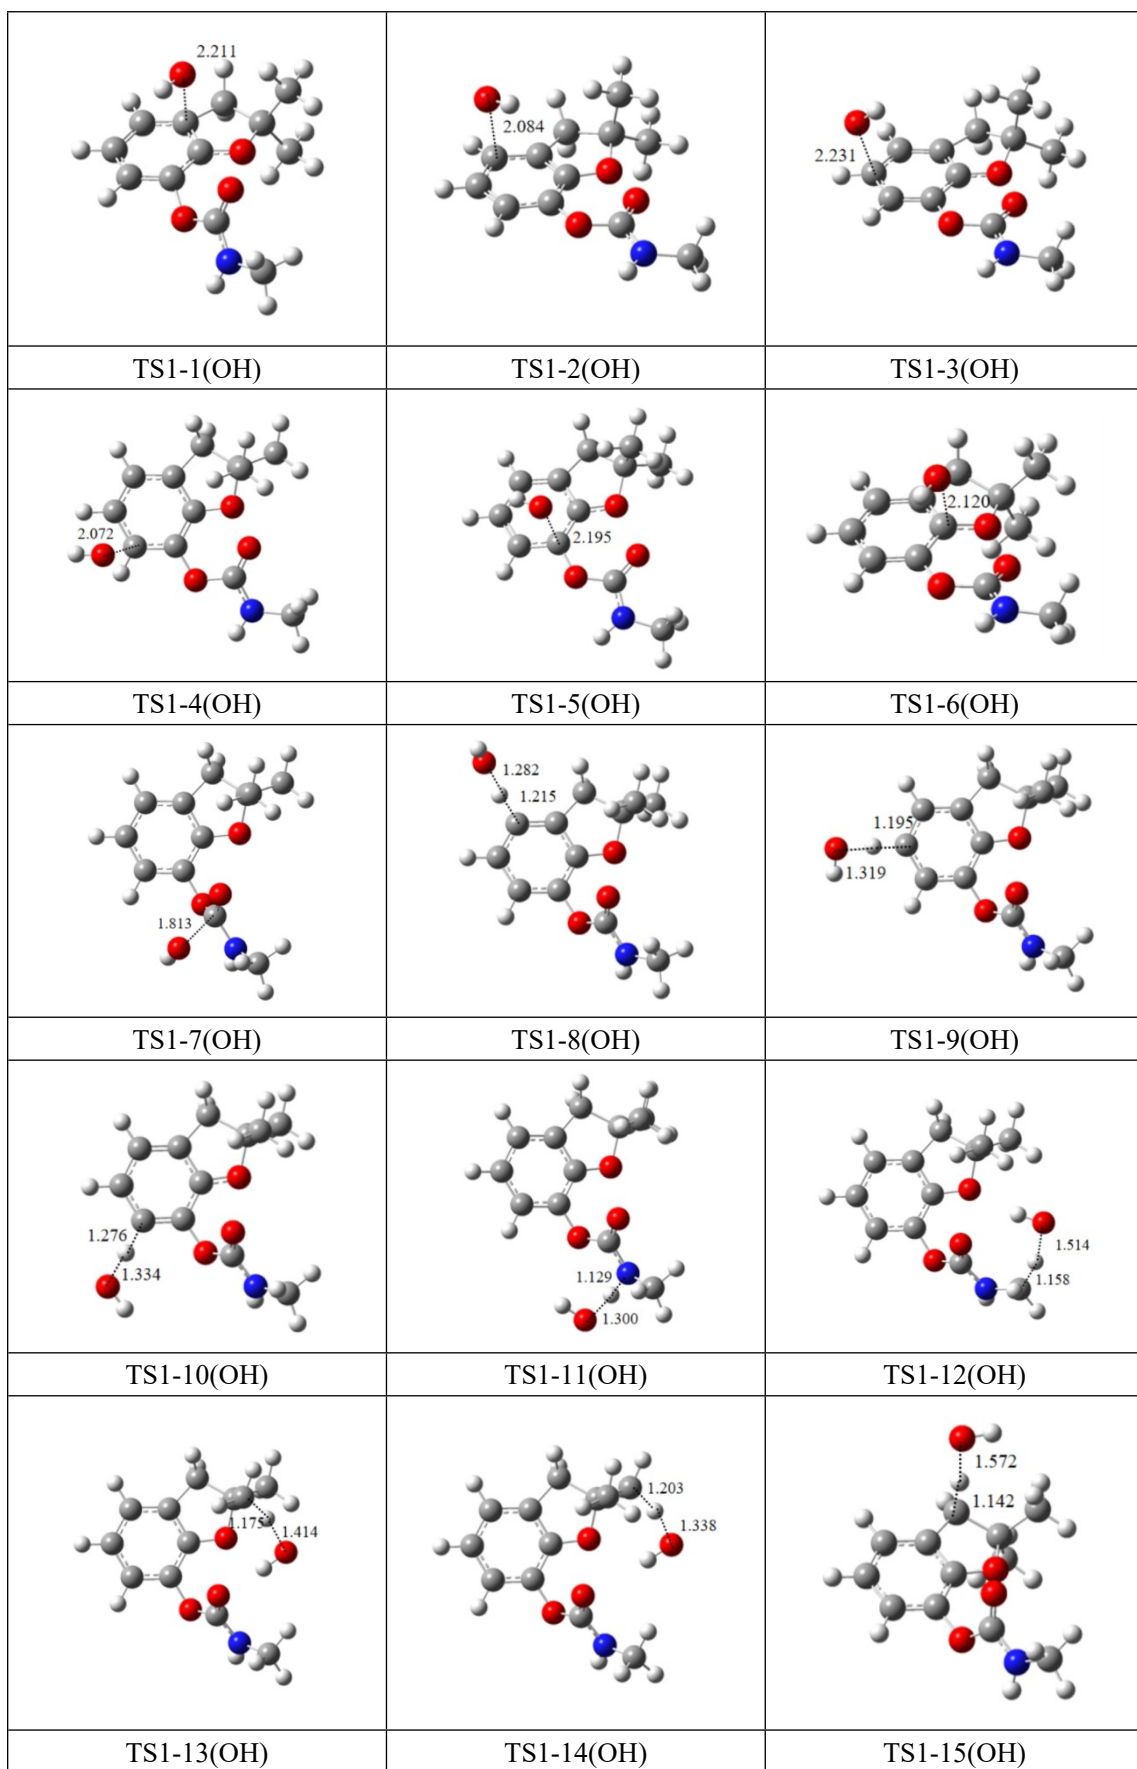

Fig. S2 Transition state configuration diagram of CBF with  $\cdot\text{OH}$
